# Supplementary material for: Correction between the Morphology of Acromion and Acromial Angle in Chinese Population: A Study on 292 Scapulas
Source: Biomed Res Int. 2018 Nov 11;2018:3125715. doi: 10.1155/2018/3125715 (PMC6252189; doi:10.1155/2018/3125715)
Supplement: Supplementary Materials — This is the original data of the classification of acromion angle and the processing of SPSS software in this research, which includes the number of scapula and detailed measurement information. [file 3125715.f1.xls]

## Sheet: Initial Data
Number	Left/Right	Measurement of Acromion Angle
		Classification one	Classification two	AB	AC	AD	Thickness of A(mm)	Thickness of B(mm)	Thickness of C(mm)	∠A	α
117	Right	C shape	curved shape	24.8	43	128.54	8.3	3.06	5.01	107	43.6
76	Right	C shape	curved shape	29.49	46.79	115.42	4.64	5.95	5.54	114.3	37.2
106	Right	C shape	flat shape	26.07	44.79	121.5	9.9	8.6	5.55	116.2	44.5
55	Right	L shape	hooked shape	40.66	49.02	141.82	5.9	6.72	5.06	117.9	60.1
42	Right	C shape	flat shape	33.24	41.94	111.05	4.52	4.58	4.6	105.8	43.5
96	Left	C shape	curved shape	23.56	39.93	112.8	5.37	7.47	4.24	138.7	50.5
94	Right	Double angle shape	hooked shape	22.23	33.76	99.67	9.03	3.58	3.69	124.2	47.9
89	Left	C shape	curved shape	28.68	43.85	122.03	4.24	2.58	3.69	88.2	62.7
128	Right	C shape	flat shape	24.61	30.62	124.8	6.12	5.6	4.08	106.2	43.3
10	Left	L shape	curved shape	32.74	45.52	130.76	7.89	6.61	5.71	99.6	47.9
31	Right	C shape	curved shape	30.29	43	123.87	9.07	7.62	6.4	131.3	57.7
129	Left	C shape	flat shape	33.69	45.67	134.31	7.44	6.42	4.65	118	48.3
107	Left	L shape	curved shape	29.92	44.23	125.29	5.88	5.95	5.41	96.5	54.8
27	Right	C shape	curved shape	27.21	44.16	114.62	5.99	4.21	5.44	114.3	60.7
56	Right	L shape	curved shape	24.01	42.87	103.74	5.61	5.16	3.5	111.4	44.6
101	Right	L shape	curved shape	29.12	49.76	132.29	3.79	5.53	5.17	98.1	63.8
87	Left	L shape	curved shape	30.47	42.83	110.52	5.12	2.36	2.31	104.3	50.1
38	Left	L shape	curved shape	30.99	48.83	115.28	4.03	4.12	3.87	113.9	60
129	Right	Double angle shape	curved shape	31.11	49.22	112.99	4.23	4.26	4.55	122.3	49.2
72	Right	L shape	curved shape	30.62	48.47	127.14	7.38	6.8	3.92	114.7	42.9
48	Right	L shape	curved shape	36.77	48.69	132.79	5.66	7.57	6.22	91.2	46.3
142	Right	L shape	hooked shape	36.65	53.12	117.04	4.61	6.81	4.25	98.9	51.1
105	Left	Double angle shape	curved shape	19.19	38.42	92.44	5.45	4.13	4.67	102.9	41.9
47	Right	L shape	flat shape	28.36	37.91	118.04	8.79	6.54	4.88	115.8	42.9
25	Left	Double angle shape	flat shape	28.55	41.96	119.44	9.97	8.77	8.57	134.2	42.7
6	Right	Double angle shape	flat shape	32.36	54.77	113.79	9.4	10.28	9.42	139.4	63.8
23	Left	Double angle shape	flat shape	33.46	47.61	102.42	7.21	7.56	5.65	112.6	47.7
71	Left	C shape	curved shape	30.15	44.23	118.88	7.64	5.75	6.36	92.2	46.7
88	Right	L shape	curved shape	33.29	44.7	132.03	7.29	5.52	5.21	113.4	57.6
115	Left	C shape	flat shape	27.86	44.31	120.14	4.5	6.04	7.08	125.7	57.6
118	Right	C shape	flat shape	23.58	35.96	115.03	7.08	7.59	5.6	105.6	67.5
86	Right	L shape	curved shape	32.44	51.87	119.78	6.05	6.63	5.74	127.5	51.5
87	Right	L shape	curved shape	33.41	46.74	121.93	7.99	6.12	6.48	116.3	53.9
96	Right	C shape	flat shape	27.38	43.28	109.73	7.93	5.58	5.68	105.3	45.7
n12	Right	Double angle shape	curved shape	27.22	37.39	108.12	8.99	5.96	4.79	121.2	41.4
39	Right	C shape	curved shape	34.03	47.35	129.37	5.59	6.16	5.6	113.4	31.5
26	Left	C shape	curved shape	29.98	43.94	124.96	9.5	7.06	7.07	109.7	23.5
9	Right	C shape	flat shape	25.72	53.68	97.59	4.91	4.92	5.47	130.4	44.7
109	Left	C shape	flat shape	35.07	40.41	112.17	9.31	7.06	4.54	105.9	53.7
113	Left	C shape	flat shape	25.01	45.42	125.2	6.8	7.1	6.06	105.9	43.9
11	Left	C shape	flat shape	26.29	46.1	122.1	7.89	5.45	5.95	103.5	63
n27	Left	C shape	flat shape	27.26	39.96	112.05	4.46	5.88	4.1	115.2	61
80	Left	C shape	curved shape	24	41	119.25	7.55	5.34	5.06	109.1	37.9
28	Right	C shape	flat shape	21.43	37.93	97.67	7.26	6.38	5.2	112.9	40.5
25	Right	L shape	flat shape	33.46	44.65	119.17	4.25	5.02	5	98.2	53.7
n36	Right	L shape	flat shape	26.68	37.75	113.23	4.55	5.28	5.67	113.3	42.2
69	Right	L shape	curved shape	23.83	35.31	101.63	5.63	4.09	4.36	110.7	52.4
n9	Right	L shape	curved shape	34.53	51.76	119.25	4.42	3.85	5.37	94.8	52.5
105	Right	L shape	flat shape	26.29	43.59	107.94	6.54	4.57	4.68	97.4	47.5
2	Right	L shape	flat shape	28.73	51.47	117.27	4.06	4.73	6.07	91.7	51.1
5	Right	L shape	curved shape	34.04	47.68	126.53	4.45	5.78	5.51	110.4	58
36	Right	L shape	curved shape	36.04	41.63	115.98	7.17	6.77	5.93	104.2	45.1
127	Right	L shape	curved shape	30.89	45.61	126.19	5.3	5.5	5.98	114.4	46.4
102	Left	C shape	curved shape	28.16	57.33	102.98	6.42	7.03	9.84	112	63.8
54	Right	L shape	curved shape	30.68	47.39	114.43	7.5	4.2	6.69	113.3	43.4
n35	Right	L shape	curved shape	29.69	49.94	128.18	5.56	7	5.9	123.7	37.2
9	Left	L shape	curved shape	29.7	44.94	107.29	9.66	9.18	5.87	86.4	42.7
n41	Left	L shape	curved shape	29.42	39.33	106.12	5.42	3.77	6.77	105.1	38.9
93	Right	L shape	curved shape	30.71	47.93	113.34	4.23	4.01	7.48	99.8	39.2
128	Left	L shape	flat shape	25.78	32.08	103.12	9.83	7.26	5.88	104.4	39.5
40	Right	L shape	curved shape	34.32	51.29	115.02	4.98	3.63	3.99	99.4	42.3
39	Left	L shape	curved shape	28.39	49.97	129.78	7.29	7.18	7.79	92.4	42.4
98	Left	C shape	flat shape	26.33	48.61	101.45	7.07	6.22	6.9	124.2	34.7
12	Left	L shape	flat shape	30.71	48.32	118.84	7.9	6	7.35	106.1	52
73	Left	L shape	flat shape	32.65	51.66	126.84	6.29	7.52	5.64	108.6	44.8
59	Left	L shape	curved shape	36.28	51.11	115.68	6.94	6.66	6.92	89.8	41.4
85	Left	L shape	curved shape	34.66	48.48	126.74	5.44	6.15	6.25	110.3	43.3
81	Right	L shape	curved shape	30.4	55.36	107.59	7.23	5.88	6.7	101.5	40.5
30	Right	L shape	curved shape	29.27	43.88	108.63	8.38	6.13	7.34	102.2	46.6
98	Left	L shape	curved shape	29.97	48.36	113.3	5.61	4.48	6.36	113.3	47.3
n7	Right	C shape	flat shape	30.08	44.56	110.11	3.82	5.19	6.37	114.4	42.4
31	Left	C shape	flat shape	22.85	44.94	100.92	4.23	3.73	4.75	110.1	38.7
93	Left	C shape	curved shape	24.73	38.81	110.72	6.94	6.32	7.2	99.9	27.4
63	Right	L shape	curved shape	29.73	39.38	109.35	7.67	5.22	5.21	110.2	53.2
94	Left	L shape	curved shape	22.78	34.67	109.98	7.84	5.1	6.6	103.6	32.6
126	Left	C shape	curved shape	26.11	39.74	118.99	5.43	3.67	3.27	121.3	33.6
n1	Left	C shape	flat shape	26.71	38.52	107.17	7.76	5.7	5.36	98.3	43.2
91	Left	C shape	curved shape	20.96	34.83	103.94	4.94	4.6	4.65	92.3	34.8
84	Right	C shape	flat shape	20.85	37.58	102.16	5.56	4.51	5	103.3	47.8
7	Right	C shape	flat shape	22.83	38.2	100.47	6.56	4.86	4.68	115.2	31.1
59	Right	C shape	curved shape	17.63	32.76	105.55	8.23	7.86	4.34	102.3	35.3
16	Left	C shape	flat shape	25.53	31.76	110.34	10.03	8.48	4.23	109.9	41.4
47	Left	C shape	flat shape	31.86	47	118.26	8.84	7.13	3.74	121.5	32.1
n20	Right	C shape	flat shape	27.95	32.08	120.2	7.39	4.8	5.38	107.1	54.3
127	Left	C shape	flat shape	21.28	33.4	89.77	8.36	6	5.54	113.4	34.6
37	Right	C shape	flat shape	26.38	48	94.32	5.75	3.5	4.03	120.3	39.6
86	Left	C shape	flat shape	23.31	39.77	118	9.5	8.98	6.4	126.4	37.2
113	Left	C shape	curved shape	25.13	39.99	116.32	10.89	7.56	8.22	105.9	43.9
100	Right	C shape	flat shape	22.5	35.06	99.37	7.78	5.74	5.15	117.3	50.1
62	Right	C shape	curved shape	24.56	44.44	101.42	6.26	5.5	4.92	125.4	41.8
133	Right	C shape	flat shape	25.69	38.19	98.51	8.8	7.31	7.21	99.8	40.7
114	Right	C shape	curved shape	29.26	47.27	109.05	6.7	3.96	7.46	114.6	29.9
n32	Right	L shape	flat shape	32	41.09	111.02	8.78	9.99	6.43	100.9	43.1
n13	Right	L shape	flat shape	20.73	42.48	113.55	8.82	6.6	7.1	132.2	61.8
4	Left	C shape	curved shape	25.6	47.61	111.94	9.43	8.08	5.73	109.8	63.08
14	Left	C shape	flat shape	26.64	47.19	116.12	3.32	4.64	5.28	108.3	54.2
76	Right	C shape	curved shape	27.81	51.83	129	8.23	6.08	5.01	129.4	43.4
2	Left	C shape	flat shape	22.5	39.51	94.55	8.54	6.31	8.47	106.4	54.2
n48	Left	C shape	curved shape	25.45	39.91	107.41	9.21	7.75	5.15	103.6	26.6
n21	Left	C shape	flat shape	28.1	39.95	99.86	3.42	4.58	5.82	103.4	40.4
11	Right	L shape	flat shape	32.3	45.03	116.73	5.39	6.13	6.93	105.9	47
n70	Left	C shape	flat shape	23.81	38.3	94.43	6.23	8	4.46	105.2	31.5
15	Left	C shape	curved shape	23.7	39.89	118.7	7.4	6.91	4.43	112.5	29.2
21	Right	C shape	flat shape	26.39	40.29	127.13	5.15	5.43	7.6	105.4	44
n7	Left	C shape	flat shape	21.37	30.8	93.52	5.66	4.63	5.91	98.3	38.4
6	Left	C shape	flat shape	24.51	43.22	98.93	5.33	3.54	4.2	129.4	38.6
99	Left	C shape	flat shape	26.24	38.69	123.32	5.7	4.48	4.83	118.3	56.3
29	Right	Double angle shape	flat shape	33.4	45.43	122.43	5.22	8.26	6.03	115.8	41.1
99	Right	C shape	flat shape	26.57	45.37	114	5.37	7.21	6.4	102	37.3
65	Left	C shape	flat shape	26.72	40.9	118.64	4.63	6.69	7.66	120.5	52.8
61	Left	C shape	curved shape	26.08	37.62	112.84	10.06	7.74	4.7	112.7	34.8
n30	Right	C shape	flat shape	17.58	29.66	103.28	6.56	3.94	5.28	131.9	51.6
78	Left	L shape	curved shape	36.98	45.61	129.82	4.55	5.08	4.2	97.1	40.1
n14	Right	C shape	flat shape	26.07	49.1	121.84	6.04	5.17	6.67	112.8	40.3
75	Left	L shape	flat shape	25.1	39.41	100.02	6.84	7.74	4.68	126.7	48.6
n57	Left	C shape	flat shape	29.11	42.78	104.45	6.44	4.14	5.8	110.9	24.7
80	Left	C shape	curved shape	28.86	46.55	106.15	9.91	7.12	7.25	121.7	45
D1	Left	L shape	flat shape	35.05	48.83	122.46	8.67	7.41	6.64	96.2	49.3
112	Right	C shape	flat shape	27.37	41.57	106.87	6	10.14	4.97	115.3	45
n19	Right	L shape	curved shape	26.25	38.13	117.48	5.22	6.96	6.19	109.4	36.2
18	Left	L shape	flat shape	24.36	34.38	103.69	6.99	5.72	6.03	110.8	47.2
72	Left	L shape	flat shape	25.64	35.53	103.7	6.21	5.23	3.83	115.2	35.9
79	Left	C shape	flat shape	26.86	36.93	120.77	7.44	5.19	4.43	41.4	111.9
123	Left	L shape	flat shape	25.6	45.09	118.23	6.82	7.03	7.54	107.7	36.9
105	Left	L shape	hooked shape	28.03	40.34	121.37	5.56	7.38	8	112.3	55.8
n64	Right	C shape	curved shape	22.84	37.93	93.18	7.25	9.22	5.63	100.9	42.4
32	Right	L shape	flat shape	29.26	51.11	114.93	5.11	4.57	6.5	112.4	48.1
19	Right	L shape	curved shape	29.29	36.93	102.54	7.6	6.66	5.26	93	52.4
77	Right	L shape	curved shape	23.09	39.16	98.28	7.44	6.78	6.34	120.3	48.2
91	Right	C shape	curved shape	18.98	39.52	90.29	8.32	6.56	6.18	113.3	42.1
121	Left	L shape	curved shape	30.65	42.69	113.15	6.53	7.46	5.19	90.5	63.5
14	Right	L shape	curved shape	30.64	40.64	115.29	6.75	7.08	5.41	113.8	40.5
n39	Right	L shape	hooked shape	24.9	42.29	78.22	10.35	8.81	4.43	140.8	41.7
139	Right	L shape	flat shape	28.19	40.35	112.88	8.02	5.26	7.49	113.5	47.1
51	Left	L shape	flat shape	27.52	40.51	110.16	5.34	5.71	8.06	108.2	56.5
n4	Right	C shape	flat shape	26.9	43.2	114.05	8.82	6.06	5.94	129	48.2
n54	Left	L shape	flat shape	24.47	38.33	104.78	8.11	5.45	6.28	114.2	66.5
67	Left	Double angle shape	flat shape	24.4	39.06	107.31	7.15	8.51	5.77	105.5	51.6
54	Left	L shape	curved shape	25.3	45.05	106.87	5.61	5.23	5.11	113	55.2
n38	Left	C shape	flat shape	24.06	39.39	106.46	7.33	6.22	5.9	141	62.1
60	Left	L shape	curved shape	35.35	42.66	117.36	5.85	6.82	6.41	121	49.4
85	Right	C shape	flat shape	26.05	40.63	103.43	6.24	7.76	6.32	118.3	36.4
78	Right	L shape	curved shape	25.34	38.13	110.75	7.03	7.09	5.14	95.4	46.6
130	Right	L shape	flat shape	25.65	41.74	117.52	4.8	4.09	4.36	127.2	52.3
88	Left	L shape	flat shape	27.74	47.29	124.11	6.23	6.2	6.16	118.5	49.3
15	Left	L shape	flat shape	28.32	38.39	110.51	11.52	10.17	7.71	116.9	43.2
121	Right	C shape	curved shape	29.24	49.24	112.22	5.96	5.56	5.31	100.5	44
64	Right	C shape	hooked shape	25.35	47.31	117.49	2.23	6.16	8.03	111.8	50.5
83	Right	L shape	flat shape	26.25	43.59	100.92	10.64	9.83	6.13	100.3	45.8
108	Left	L shape	hooked shape	28.96	53.18	105.13	5.59	6.25	4.28	113.6	38.9
n44	Left	L shape	curved shape	23.5	39.63	102.29	7.6	7.92	6.39	98.3	47.4
52	Left	L shape	flat shape	22.92	28.86	96.76	5.72	6.04	6.5	121	41.1
110	Right	L shape	hooked shape	26.79	48.6	112.3	5.92	5.3	5.77	107.9	40.2
76	Right	L shape	curved shape	28.88	51.68	113.52	6.51	7.5	7.36	99.4	43.2
66	Left	L shape	curved shape	29.86	47.62	114.54	5.07	6.96	6.97	102	39.8
65	Right	L shape	curved shape	32.41	45.14	110.7	4.91	5.99	6.35	101.8	36
19	Left	C shape	flat shape	26.78	39.04	121.65	4.86	5.97	5.31	112.3	37.2
29	Left	L shape	curved shape	25.78	37.57	108.46	4.29	4.11	4.16	100.2	45.6
92	Left	C shape	curved shape	29.28	39.95	119.03	4.34	5.31	5.64	105.9	43.3
7	Left	C shape	curved shape	21.11	35.71	102.23	6.7	4.79	4.04	113.7	43.3
122	Right	L shape	curved shape	25.54	39.26	112.22	4.24	4.46	5.77	120.1	40.9
8	Right	C shape	curved shape	26.19	37.82	126.7	7.75	6.01	7.78	102.6	43.8
1	Left	C shape	flat shape	26.68	36.79	122.38	5.56	5.75	4.44	123.4	36
1	Right	L shape	flat shape	28.26	52.07	122.56	5.7	5.71	6.42	121.6	38.5
79	Right	L shape	flat shape	34.55	49.1	122.03	4.64	6.66	7.9	116.7	39
101	Left	C shape	flat shape	28.84	44.72	118.93	5.96	5.45	7.53	111	42.9
46	Left	L shape	curved shape	28.44	42.86	118.9	4.62	4.81	6.58	103.8	42.2
n52	Left	L shape	flat shape	29.1	44.09	118.09	5.74	7.96	5.56	100.8	41
49	Left	L shape	flat shape	30.2	45.72	107.92	9.45	6.5	8.73	105.7	38.5
33	Right	L shape	curved shape	28.37	44.85	102.72	7.6	5.94	6.22	110.4	41.8
23	Right	C shape	curved shape	27.47	38.34	106.84	5.75	8.58	5.15	108.9	46.7
51	Right	L shape	flat shape	32.69	42.43	118.49	6.75	5.41	6.34	112.7	42.5
75	Right	Double angle shape	flat shape	28.28	44.19	115.92	7.44	5.32	4.17	120.6	51.2
100	Left	C shape	curved shape	26.67	41.97	117.52	8.05	6.05	4.68	109.6	40.8
41	Left	C shape	curved shape	26.98	46.96	111.02	6.15	5.34	4.8	104.6	44.8
103	Right	L shape	flat shape	31.51	50	117.43	4.97	6.75	5.14	97.5	45
104	Left	L shape	curved shape	21.78	38.03	107.69	5.04	4.74	4.67	106	41.6
37	Left	L shape	curved shape	27.22	37.58	103.04	7.27	5.38	5.48	98.6	39.8
n15	Left	C shape	curved shape	34.88	45.86	124.34	7.88	6.95	4.66	106.5	37.4
69	Left	C shape	curved shape	29.14	44.01	130.26	6.18	5.68	5.45	110.7	31
n68	Left	L shape	curved shape	20.7	33.1	98.82	4.89	5.17	4.3	93.7	45.6
124	Left	C shape	flat shape	22.94	33.49	85.66	5.78	5.22	5.87	114.1	48.3
n16	Right	Double angle shape	flat shape	30.19	43.13	118.65	4.92	6.78	5.58	118.5	51.9
123	Right	L shape	curved shape	26.12	44.44	108.78	7.64	5.85	5.06	93.8	51.2
134	Right	C shape	curved shape	27.28	42.07	100.55	7.27	5.07	4.79	113.7	46.8
41	Right	L shape	curved shape	32.71	47.1	119.31	6.45	5.98	5.73	99.5	47.4
100	Left	C shape	flat shape	23.43	45.93	97.37	6.8	5.3	4.47	113.9	49
106	Left	C shape	curved shape	25.51	42.68	112.18	7.38	6.05	5.44	103.6	37.4
58	Left	L shape	curved shape	31.03	46.18	124.17	6.6	5.08	6.58	105.7	58
120	Right	L shape	flat shape	26.16	40.57	104.31	6.17	5.98	5.9	99.6	55.3
60	Right	C shape	flat shape	27.22	38.89	114.94	7.19	5.78	6.18	102.4	38.3
n2	Right	C shape	flat shape	25.54	41.73	125.04	8.18	5.63	6.22	109.5	45.2
50	Left	L shape	flat shape	26.73	42.17	119.84	7.17	9.09	5.88	100.3	43.9
102	Right	L shape	flat shape	30.17	47.71	118.13	6.93	6.12	6.28	98.9	41.2
116	Right	L shape	flat shape	26.54	36.8	112.04	7.5	3.99	5.92	101.3	44.6
116	Left	Double angle shape	curved shape	27.73	45.6	106.43	8.83	5.68	6.41	119.6	56.3
82	Right	C shape	flat shape	26.94	41.91	112.98	9.51	7.74	6.48	133.5	43.1
138	Right	L shape	curved shape	34.05	48.24	112.09	5.91	5.42	6.57	96.2	49.8
16	Right	C shape	flat shape	27.14	46.87	116.87	6.86	8.81	7.84	96.3	52
104	Right	L shape	curved shape	26.13	44.93	102.27	7.52	4.52	5.4	91.5	58.2
57	Right	C shape	flat shape	30.13	46.77	121.41	10.89	6.04	8.17	118.4	42.8
70	Right	L shape	curved shape	29.26	42.55	107.33	5.04	4.63	6.25	96	41.5
62	Left	L shape	curved shape	28.99	39.04	117.12	8.42	7.73	5.15	98.2	40.3
52	Right	L shape	curved shape	26.62	41.34	101.86	5.72	2.78	4.17	88.8	40.9
17	Right	L shape	flat shape	31.46	45.39	120.56	5.31	3.51	4.08	84.3	48.4
17	Left	C shape	flat shape	18	34.39	97.8	5.45	5.76	4.81	79.5	46.9
46	Right	C shape	curved shape	25.38	36.89	121.83	6.01	5.99	5.3	108.6	41
98	Right	C shape	curved shape	27.1	43.22	101.09	10.16	6.11	7.88	108.3	29.2
53	Right	L shape	flat shape	32.6	46.36	118.45	5.1	7.6	5.6	93.3	40.7
125	Left	L shape	curved shape	26.12	36.77	103.59	3.44	4.3	4.93	93.5	66.3
132	Right	L shape	curved shape	27.33	35.64	110.7	3.8	5.14	3.7	95.4	51.5
137	Right	Double angle shape	curved shape	35.88	46.65	114.34	5.2	3.34	5.29	93.1	45.5
88	Left	L shape	curved shape	25.66	39.48	102.67	4.82	4.98	6.46	91.3	55.2
n63	Left	C shape	curved shape	30.1	38	117.36	6.46	5.54	5.62	99.6	49.6
8	Left	C shape	curved shape	22.15	33.65	97.89	4.86	4.74	5.19	118.3	49.6
3	Left	C shape	curved shape	30.07	47.75	123.52	6.84	7.15	4.63	95.1	55.7
12	Right	L shape	curved shape	30.19	43.28	125.73	6.67	6.01	5.65	94.7	48.2
107	Right	C shape	flat shape	26.27	45.35	103.95	8.88	5.54	6.08	122.2	38.7
3	Right	C shape	flat shape	24.24	37.42	122.74	5.53	5.87	6.46	90.6	54.9
73	Right	C shape	hooked shape	19.63	56.02	113.81	7.35	5.95	7.82	118.4	50.8
77	Left	C shape	curved shape	23.71	40.14	109.15	9.79	12.09	6.36	108.9	43.2
42	Left	C shape	flat shape	23.91	40.48	104.76	4.95	4.73	3.77	107.1	39.1
67	Right	L shape	flat shape	27.47	49.39	98.19	9.37	9.55	5.85	111.9	27.1
44	Left	C shape	flat shape	20.4	41.17	110.7	6.68	5.11	4.68	124.8	47.4
4	Right	L shape	curved shape	26.6	44.29	122.69	9.49	10.63	6.28	104.96	49.3
24	Left	L shape	curved shape	23.02	37.73	102.95	5.34	6.34	7.79	106.3	40.2
50	Right	C shape	flat shape	30.71	39.22	112.38	5.89	7.09	8.2	93.7	55.4
18	Right	L shape	curved shape	29.54	47.06	105.79	8.14	7.8	5.9	107.4	34.4
89	Right	C shape	flat shape	22.51	36.64	106.2	6.38	3.38	4.44	112.1	54.7
57	Left	L shape	curved shape	24.9	39.63	110.01	6.83	4.45	3.88	105.1	22.8
99	Left	L shape	curved shape	33.14	49	110.73	6.75	6.89	6.44	99.7	37.4
74	Left	L shape	curved shape	27.18	40.04	97.15	5.22	3.08	5.23	97.8	37.8
27	Left	L shape	curved shape	27.21	45.28	102.68	6.01	3.94	4.93	103.2	31.7			2
117	Left	L shape	curved shape	32.91	39.59	110.46	7.01	6.36	4.66	96.6	50.2
135	Right	C shape	curved shape	19.62	33.52	106.97	5.66	4.55	3.64	123	41.6
33	Left	L shape	flat shape	32.12	47.92	115.62	7.44	7.15	5.99	99	22.73
95	Right	L shape	flat shape	35.14	47.72	115.04	5.66	5.45	5.45	105.1	41.8
97	Right	L shape	flat shape	28.85	41.74	119.77	4.28	4.02	5.17	104	48
84	Left	L shape	curved shape	31.57	44.88	125.76	7.92	3.45	6.5	98.8	40.6
126	Right	C shape	flat shape	20.92	33.2	96.89	4.08	4.04	5.51	102.4	44.9
111	Right	C shape	flat shape	19.18	26.63	102.83	5.26	4.51	4.9	105.9	30.7
n3	Right	L shape	flat shape	26.13	45.39	103.09	4.39	9.66	5.25	105.6	32.4
113	Right	C shape	flat shape	21.21	33.53	95.27	6.22	3.47	4.49	112.2	50.4
36	Left	C shape	curved shape	26.6	41.64	104.66	6.66	5.68	5.45	106	29.6
34	Left	L shape	curved shape	23.96	33.59	106.54	5.3	5.81	6.12	104.9	41.4
15	Right	C shape	flat shape	29.23	49.56	115.63	4.93	5.78	5.08	104.7	36.9
95	Left	C shape	curved shape	30.15	49.8	110.41	4.22	7.01	7.18	102.2	39.4
22	Right	L shape	curved shape	30.79	36.14	113.88	8.01	4.02	6.83	105.6	39.5
63	Left	C shape	flat shape	25.25	31.48	110.17	6.72	3.94	5.5	113.8	47.1
92	Right	L shape	flat shape	30.69	35.22	115.74	5.15	6.61	6.35	99.9	45.2
n69	Left	C shape	flat shape	28.66	39.88	109.32	6.99	4.59	3.85	104	35.5
131	Right	C shape	curved shape	27.09	46.5	119.76	13.15	10.76	6.99	115.4	43.6
48	Right	L shape	flat shape	36.88	49.18	123.02	7.51	7.65	5.84	96	50.8
70	Left	L shape	flat shape	31	48.36	122.49	5.24	7.5	5.33	94.7	55.5
21	Left	C shape	curved shape	23.55	35.45	99.21	6	6.34	5.18	106.3	45.2
55	Left	L shape	flat shape	24.99	35.88	112.89	5.11	5.13	5.53	114.7	58.5
45	Left	L shape	curved shape	25.41	40.84	109.85	5.17	4.39	4.59	103.6	40.2
61	Right	Double angle shape	curved shape	29.18	43.26	116.63	5.98	5.61	5.72	117.7	48.7
118	Left	C shape	curved shape	27.37	43.46	117.33	5.03	5.4	5.5	114.7	40
91	Left	C shape	curved shape	21.05	34.97	97.86	6.51	5.51	5.5	103.6	41.2
44	Right	C shape	curved shape	22.58	36.16	96.83	7.68	6.51	6.68	106.3	42.8
56	Left	L shape	flat shape	28.78	44.64	110.4	6.77	4.76	6.09	98.9	43.8
n47	Left	L shape	curved shape	24.07	39.71	89.23	12.53	10.97	11.28	103.7	40.5
66	Right	C shape	curved shape	29.86	49.83	110.39	14.65	10.92	11.61	97.1	48.1
125	Right	C shape	curved shape	26.45	33.4	99.17	11.72	10.42	10.46	106.4	43.6
32	Right	L shape	curved shape	28.72	51.63	115.79	7.2	8.36	5.12	104.1	45.5
38	Right	L shape	curved shape	29.33	45.03	119.28	7.39	6.56	7.55	113.5	42.2
58	Right	L shape	flat shape	28.39	44.72	112.82	5.95	7.05	5.08	102.1	42.4
117	Left	L shape	curved shape	33.5	41.42	118.42	6.51	5.08	4.14	98.5	51.6
53	Left	C shape	flat shape	25.41	38.57	110.71	6.22	5.87	5.47	110.8	42.1
90	Right	L shape	flat shape	29.66	43.73	124.05	8.18	4.86	8.45	105.3	30.9
49	Right	L shape	curved shape	29	42.91	124.56	5.05	3.75	4.89	96.9	38.1
81	Left	C shape	flat shape	25.98	38.14	96.97	4.1	4.35	3.28	93.5	50
97	Left	L shape	curved shape	26.02	36.42	118.84	5.25	6.23	5.88	119.7	44.4
24	Right	C shape	flat shape	31.26	47.91	125.8	7.83	6.17	7.13	107.6	33.6
68	Right	L shape	curved shape	29.54	42.28	104.66	3.87	4.24	6.63	98.2	31.4
n8	Right	C shape	flat shape	24.92	37.95	109.51	6.71	5.88	6.27	121.3	62.2
n5	Right	C shape	flat shape	30.7	45.08	120.04	7.09	7.81	5.45	114.1	49.5
34	Right	C shape	flat shape	26.4	36.13	121.43	6.47	6.48	5.32	117.6	50.4
n62	Left	C shape	flat shape	25.92	33.73	120.63	7.7	5.22	4.1	110.3	48.7
125	Right	C shape	flat shape	22.42	31.87	101.38	6.03	4.19	4.72	106.9	55.1
40	Left	C shape	flat shape	26.68	36.93	111.55	7.37	6.08	4.67	121.9	53
118	Left	C shape	flat shape	25.06	33.92	108.29	5.96	5.72	5.11	118.2	36.6
n65	Right	C shape	flat shape	27.88	39.51	112.63	6.01	3.12	5.6	108.7	42.7
n51	Right	L shape	curved shape	24.95	48.42	110.93	7.8	7.33	5.63	102.8	64.6
126	Right	L shape	flat shape	20.61	33.36	96.27	3.47	3.86	6.5	97.4	57.2
30	Left	L shape	curved shape	33.81	45.89	123.42	6.1	5.37	4.74	95.4	45
32	Left	C shape	flat shape	26.86	43.45	118.11	5.99	7.41	6.25	99.3	49.8
112	Right	C shape	curved shape	27.46	42.18	109.66	4.09	5.44	7.39	104.5	61.1
105	Left	L shape	flat shape	27.87	46.39	111.62	7.26	10.06	6.74	100.2	50.6
93	Left	C shape	curved shape	24.15	35.59	124.97	5.94	4.83	4.97	102.6	42
5	Left	C shape	curved shape	25.38	42.17	102.18	6.08	9.22	6.36	103.4	66

## Sheet: Statistical Analysis
	AB						Descriptives
			aim
								95% Confidence Interval for Mean
				N	Mean	Std. Deviation	Std. Error	Lower Bound	Upper Bound	Minimum	Maximum
			C	138	25.9451	3.39064	0.28863	25.3744	26.5159	17.58	35.07
			L	140	29.0869	3.79701	0.32091	28.4524	29.7213	20.61	40.66
			Double angle	14	28.7986	4.57367	1.22236	26.1578	31.4393	19.19	35.88
			Total	292	27.5883	3.95787	0.23162	27.1324	28.0441	17.58	40.66
				Test of Homogeneity of Variances
			aim
			Levene Statistic	df1	df2	Sig.
			1.85	2	289	0.159
					ANOVA
			aim
				Sum of Squares	df	Mean Square	F	Sig.
			Between Groups	707.495	2	353.748	26.548	0
			Within Groups	3850.95	289	13.325
			Total	4558.44	291
						Multiple Comparisons
			aim
			LSD
								95% Confidence Interval
			(I) group	(J) group	Mean Difference (I-J)	Std. Error	Sig.	Lower Bound	Upper Bound
			C	L	-3.14171*	0.43788	0	-4.0035	-2.2799
				Double angle	-2.85343*	1.02389	0.006	-4.8687	-0.8382
			L	C	3.14171*	0.43788	0	2.2799	4.0035
				Double angle	0.28829	1.02322	0.778	-1.7256	2.3022
			Double angle	C	2.85343*	1.02389	0.006	0.8382	4.8687
				L	-0.28829	1.02322	0.778	-2.3022	1.7256
			*. The mean difference is significant at the 0.05 level.
	AC						Descriptives
			aim
								95% Confidence Interval for Mean
				N	Mean	Std. Deviation	Std. Error	Lower Bound	Upper Bound	Minimum	Maximum
			C	138	40.9351	5.50463	0.46858	40.0085	41.8617	26.63	57.33
			L	140	43.4708	5.57488	0.47116	42.5392	44.4024	20.73	55.36
			Double angle	14	43.6036	5.37296	1.43598	40.5013	46.7058	33.76	54.77
			Total	292	42.2788	5.65904	0.33117	41.627	42.9306	20.73	57.33
				Test of Homogeneity of Variances
			aim
			Levene Statistic	df1	df2	Sig.
			0.117	2	289	0.89
					ANOVA
			aim
				Sum of Squares	df	Mean Square	F	Sig.
			Between Groups	472.66	2	236.33	7.72	0.001
			Within Groups	8846.54	289	30.611
			Total	9319.2	291
						Multiple Comparisons
			aim
			LSD
								95% Confidence Interval
			(I) group	(J) group	Mean Difference (I-J)	Std. Error	Sig.	Lower Bound	Upper Bound
			C	L	-2.53571*	0.66368	0	-3.842	-1.2295
				Double angle	-2.6685	1.55187	0.087	-5.7229	0.3859
			L	C	2.53571*	0.66368	0	1.2295	3.842
				Double angle	-0.13279	1.55085	0.932	-3.1852	2.9196
			Double angle	C	2.6685	1.55187	0.087	-0.3859	5.7229
				L	0.13279	1.55085	0.932	-2.9196	3.1852
			*. The mean difference is significant at the 0.05 level.
	AD						Descriptives
			aim
								95% Confidence Interval for Mean
				N	Mean	Std. Deviation	Std. Error	Lower Bound	Upper Bound	Minimum	Maximum
			C	138	111.099	10.1931	0.86769	109.383	112.814	85.66	134.31
			L	139	113.524	9.54788	0.80984	111.923	115.126	78.22	141.82
			Double angle	14	110.756	8.44723	2.25762	105.878	115.633	92.44	122.43
			Total	291	112.241	9.85795	0.57788	111.103	113.378	78.22	141.82
				Test of Homogeneity of Variances
			aim
			Levene Statistic	df1	df2	Sig.
			1.218	2	288	0.297
					ANOVA
			aim
				Sum of Squares	df	Mean Square	F	Sig.
			Between Groups	439.898	2	219.949	2.283	0.104
			Within Groups	27742.1	288	96.327
			Total	28182	290
						Multiple Comparisons
			aim
			LSD
								95% Confidence Interval
			(I) group	(J) group	Mean Difference (I-J)	Std. Error	Sig.	Lower Bound	Upper Bound
			C	L	-2.42569*	1.17941	0.041	-4.7471	-0.1043
				Double angle	0.34291	2.75291	0.901	-5.0755	5.7613
			L	C	2.42569*	1.17941	0.041	0.1043	4.7471
				Double angle	2.7686	2.75199	0.315	-2.648	8.1852
			Double angle	C	-0.34291	2.75291	0.901	-5.7613	5.0755
				L	-2.7686	2.75199	0.315	-8.1852	2.648
			*. The mean difference is significant at the 0.05 level.
	A (mm)						Descriptives
			aim
								95% Confidence Interval for Mean
				N	Mean	Std. Deviation	Std. Error	Lower Bound	Upper Bound	Minimum	Maximum
			C	138	6.8321	1.92354	0.16374	6.5083	7.1559	2.23	14.65
			L	140	6.4022	1.66265	0.14052	6.1244	6.68	3.44	12.53
			Double angle	14	7.0729	1.92248	0.51381	5.9628	8.1829	4.23	9.97
			Total	292	6.6375	1.81141	0.106	6.4289	6.8462	2.23	14.65
				Test of Homogeneity of Variances
			aim
			Levene Statistic	df1	df2	Sig.
			0.689	2	289	0.503
					ANOVA
			aim
				Sum of Squares	df	Mean Square	F	Sig.
			Between Groups	15.63	2	7.815	2.405	0.092
			Within Groups	939.201	289	3.25
			Total	954.831	291
						Multiple Comparisons
			aim
			LSD
								95% Confidence Interval
			(I) group	(J) group	Mean Difference (I-J)	Std. Error	Sig.	Lower Bound	Upper Bound
			C	L	.42989*	0.21625	0.048	0.0043	0.8555
				Double angle	-0.24076	0.50565	0.634	-1.236	0.7545
			L	C	-.42989*	0.21625	0.048	-0.8555	-0.0043
				Double angle	-0.67064	0.50532	0.185	-1.6652	0.3239
			Double angle	C	0.24076	0.50565	0.634	-0.7545	1.236
				L	0.67064	0.50532	0.185	-0.3239	1.6652
			*. The mean difference is significant at the 0.05 level.
	B (mm)						Descriptives
			aim
								95% Confidence Interval for Mean
				N	Mean	Std. Deviation	Std. Error	Lower Bound	Upper Bound	Minimum	Maximum
			C	138	6.0569	1.63901	0.13952	5.781	6.3328	2.58	12.09
			L	140	6.0465	1.65963	0.14026	5.7692	6.3238	2.36	10.97
			Double angle	14	6.2886	2.13848	0.57153	5.0539	7.5233	3.34	10.28
			Total	292	6.063	1.66951	0.0977	5.8707	6.2553	2.36	12.09
				Test of Homogeneity of Variances
			aim
			Levene Statistic	df1	df2	Sig.
			1.825	2	289	0.163
					ANOVA
			aim
				Sum of Squares	df	Mean Square	F	Sig.
			Between Groups	0.756	2	0.378	0.135	0.874
			Within Groups	810.338	289	2.804
			Total	811.093	291
						Multiple Comparisons
			aim
			LSD
								95% Confidence Interval
			(I) group	(J) group	Mean Difference (I-J)	Std. Error	Sig.	Lower Bound	Upper Bound
			C	L	0.01038	0.20086	0.959	-0.385	0.4057
				Double angle	-0.23169	0.46968	0.622	-1.1561	0.6927
			L	C	-0.01038	0.20086	0.959	-0.4057	0.385
				Double angle	-0.24207	0.46937	0.606	-1.1659	0.6817
			Double angle	C	0.23169	0.46968	0.622	-0.6927	1.1561
				L	0.24207	0.46937	0.606	-0.6817	1.1659
	C (mm)						Descriptives
			aim
								95% Confidence Interval for Mean
				N	Mean	Std. Deviation	Std. Error	Lower Bound	Upper Bound	Minimum	Maximum
			C	138	5.7012	1.37069	0.11668	5.4704	5.9319	3.27	11.61
			L	140	5.8373	1.19818	0.10126	5.6371	6.0375	2.31	11.28
			Double angle	14	5.7364	1.57998	0.42227	4.8242	6.6487	3.69	9.42
			Total	292	5.7681	1.29856	0.07599	5.6186	5.9177	2.31	11.61
				Test of Homogeneity of Variances
			aim
			Levene Statistic	df1	df2	Sig.
			0.902	2	289	0.407
					ANOVA
			aim
				Sum of Squares	df	Mean Square	F	Sig.
			Between Groups	1.303	2	0.651	0.385	0.681
			Within Groups	489.4	289	1.693
			Total	490.703	291
						Multiple Comparisons
			aim
			LSD
								95% Confidence Interval
			(I) group	(J) group	Mean Difference (I-J)	Std. Error	Sig.	Lower Bound	Upper Bound
			C	L	-0.13613	0.1561	0.384	-0.4434	0.1711
				Double angle	-0.03527	0.36501	0.923	-0.7537	0.6831
			L	C	0.13613	0.1561	0.384	-0.1711	0.4434
				Double angle	0.10086	0.36477	0.782	-0.6171	0.8188
			Double angle	C	0.03527	0.36501	0.923	-0.6831	0.7537
				L	-0.10086	0.36477	0.782	-0.8188	0.6171
	∠A						Descriptives
			aim
								95% Confidence Interval for Mean
				N	Mean	Std. Deviation	Std. Error	Lower Bound	Upper Bound	Minimum	Maximum
			C	138	110.219	11.6646	0.99295	108.255	112.182	41.4	141
			L	140	104.955	9.76255	0.82509	103.324	106.587	84.3	140.8
			Double angle	14	117.686	11.878	3.17452	110.828	124.544	93.1	139.4
			Total	292	108.053	11.2778	0.65998	106.754	109.352	41.4	141
				Test of Homogeneity of Variances
			aim
			Levene Statistic	df1	df2	Sig.
			0.126	2	289	0.882
					ANOVA
			aim
				Sum of Squares	df	Mean Square	F	Sig.
			Between Groups	3289.68	2	1644.84	14.096	0
			Within Groups	33722.3	289	116.686
			Total	37012	291
						Multiple Comparisons
			aim
			LSD
								95% Confidence Interval
			(I) group	(J) group	Mean Difference (I-J)	Std. Error	Sig.	Lower Bound	Upper Bound
			C	L	5.26341*	1.29577	0	2.7131	7.8138
				Double angle	-7.46687*	3.0299	0.014	-13.4303	-1.5034
			L	C	-5.26341*	1.29577	0	-7.8138	-2.7131
				Double angle	-12.73029*	3.0279	0	-18.6898	-6.7707
			Double angle	C	7.46687*	3.0299	0.014	1.5034	13.4303
				L	12.73029*	3.0279	0	6.7707	18.6898
			*. The mean difference is significant at the 0.05 level.
	α
							Descriptives
			aim
								95% Confidence Interval for Mean
				N	Mean	Std. Deviation	Std. Error	Lower Bound	Upper Bound	Minimum	Maximum
			C	138	44.8281	10.7244	0.91293	43.0229	46.6334	23.5	111.9
			L	140	45.7059	8.09969	0.68455	44.3525	47.0594	22.73	66.5
			Double angle	14	48.6357	6.30038	1.68385	44.998	52.2734	41.1	63.8
			Total	292	45.4315	9.37873	0.54885	44.3513	46.5118	22.73	111.9
				Test of Homogeneity of Variances
			aim
			Levene Statistic	df1	df2	Sig.
			2.184	2	289	0.114
					ANOVA
			aim
				Sum of Squares	df	Mean Square	F	Sig.
			Between Groups	204.523	2	102.262	1.164	0.314
			Within Groups	25392	289	87.862
			Total	25596.5	291
